# Supplementary material
Source: PubMed Central journal article supplement (PMC3409725)

Azidohexanoic acid-LPETGG-CONH<sub>2</sub> (1)

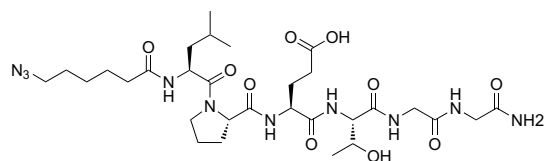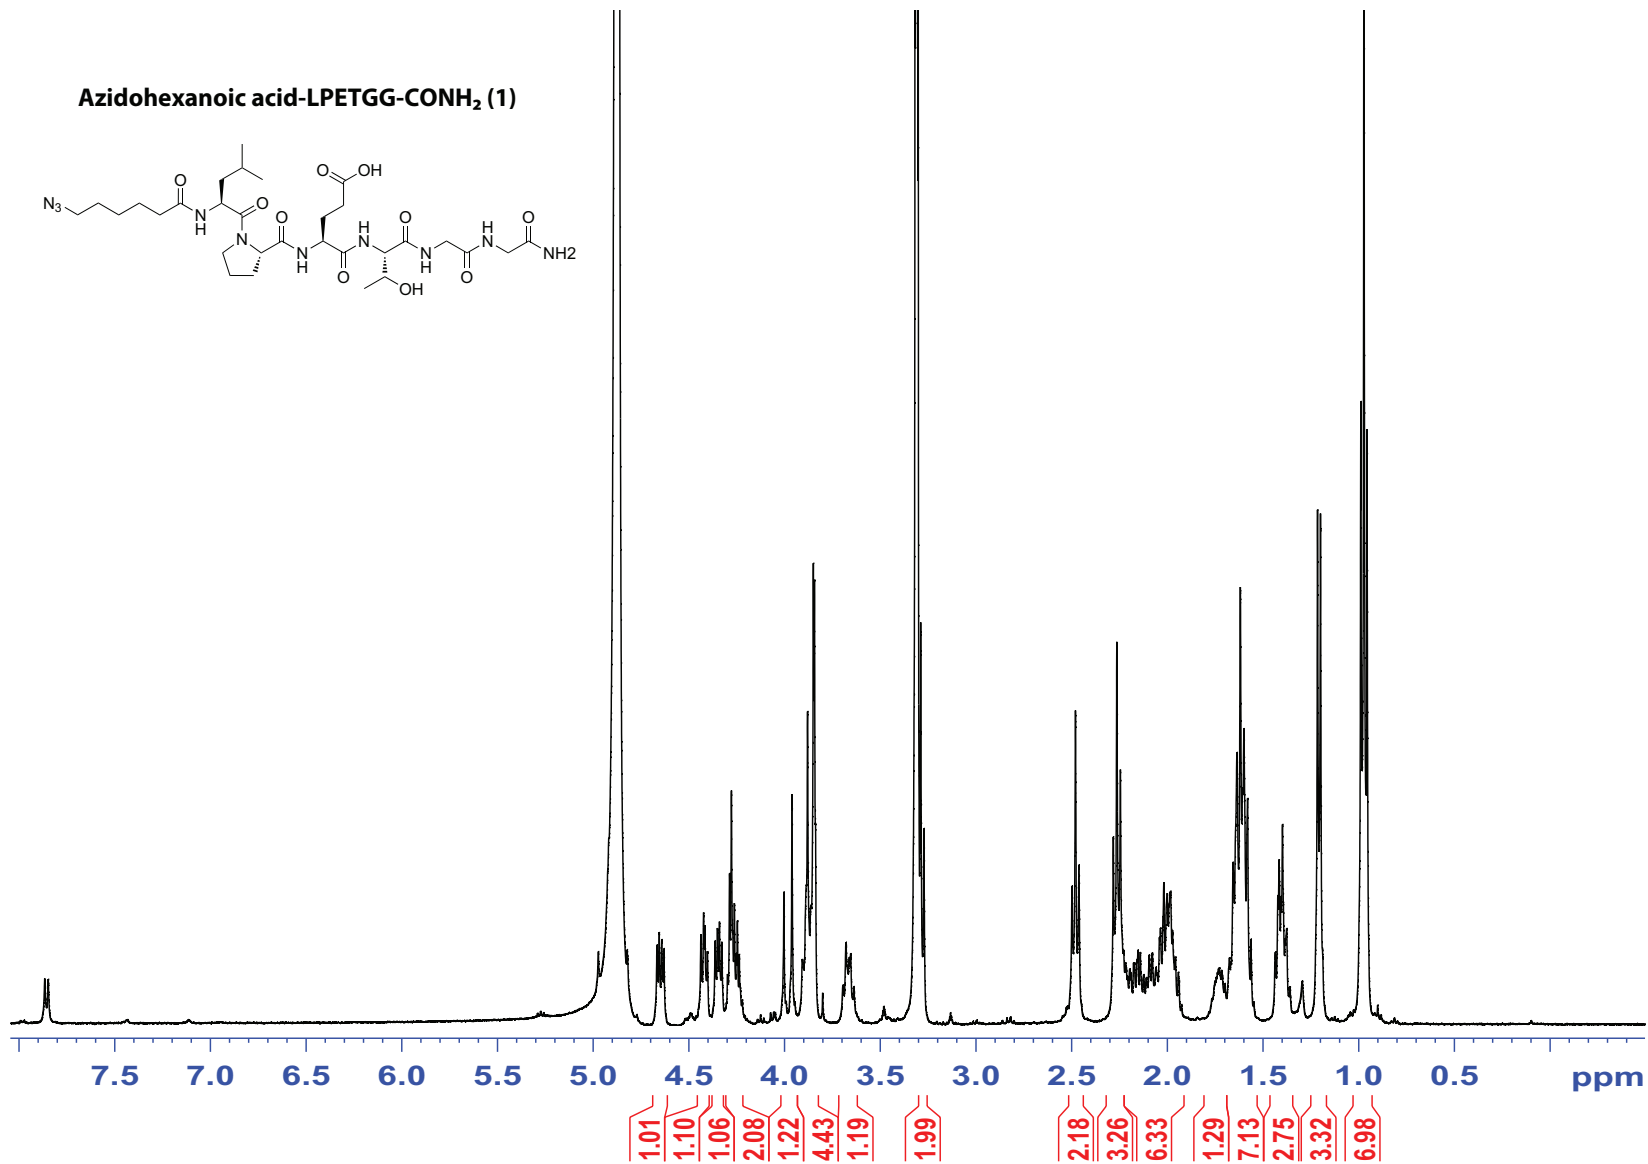

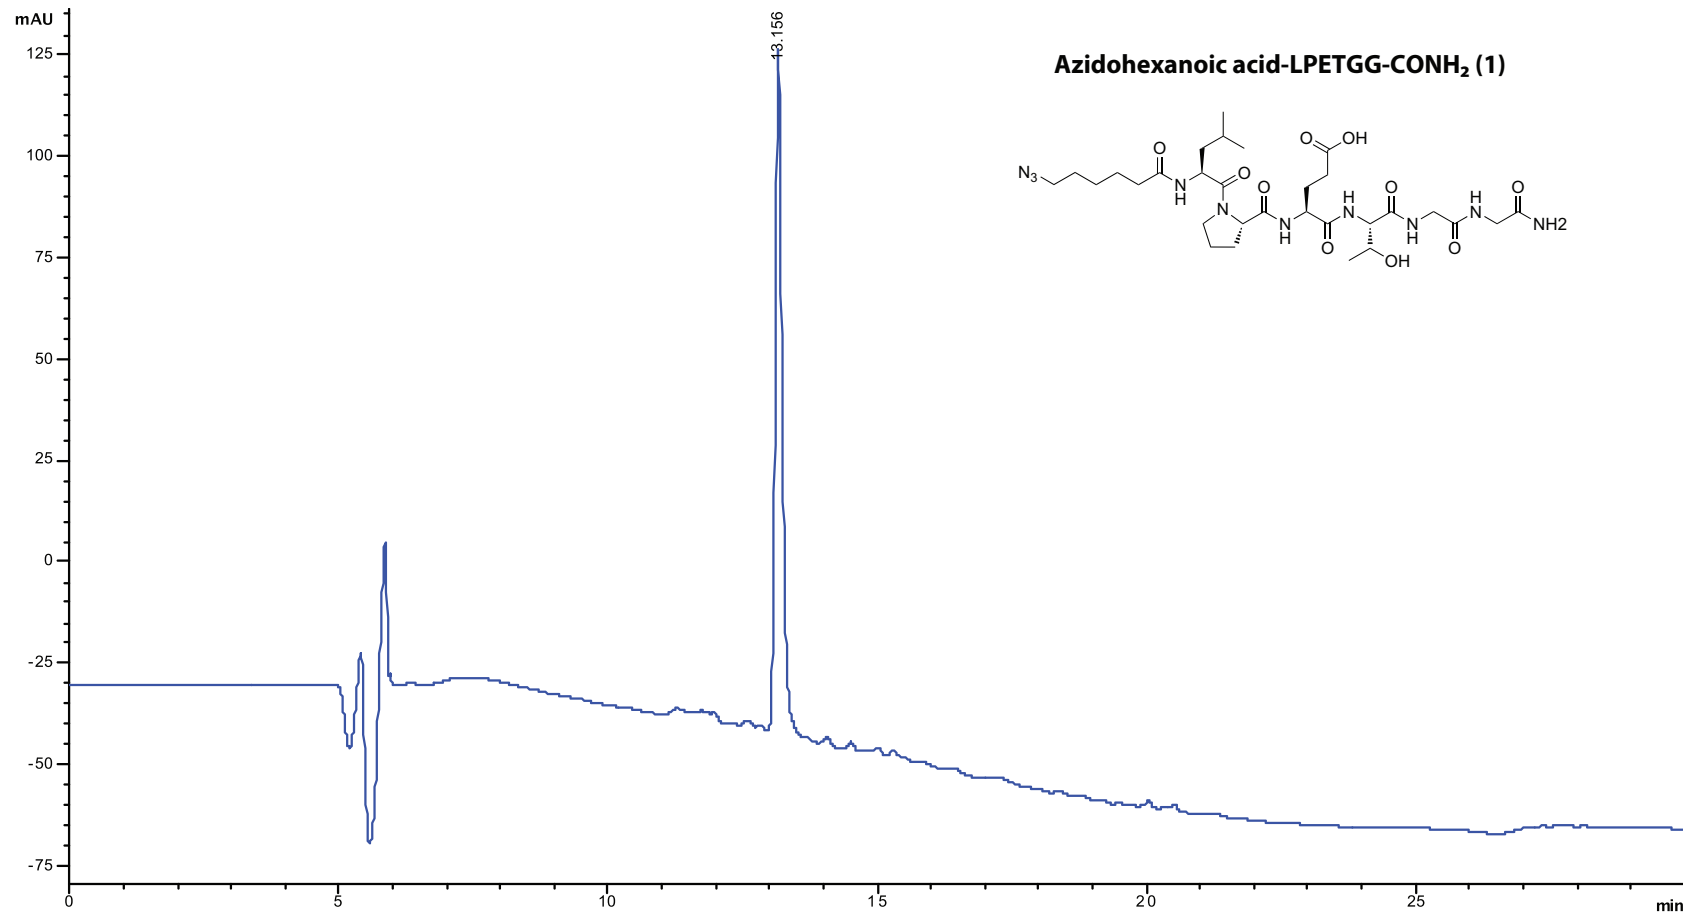

**Azidohexanoic acid-LPETGG-CONH<sub>2</sub> (1)**

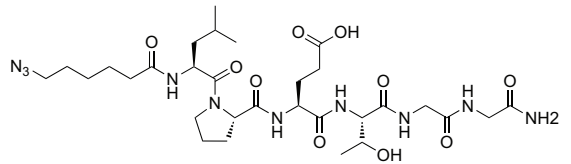

TOF MS ES+  
7.38e4

**Azidohexanoic acid-LPETGG-CONH<sub>2</sub> (1)**

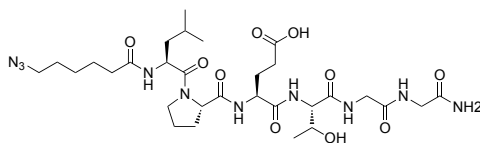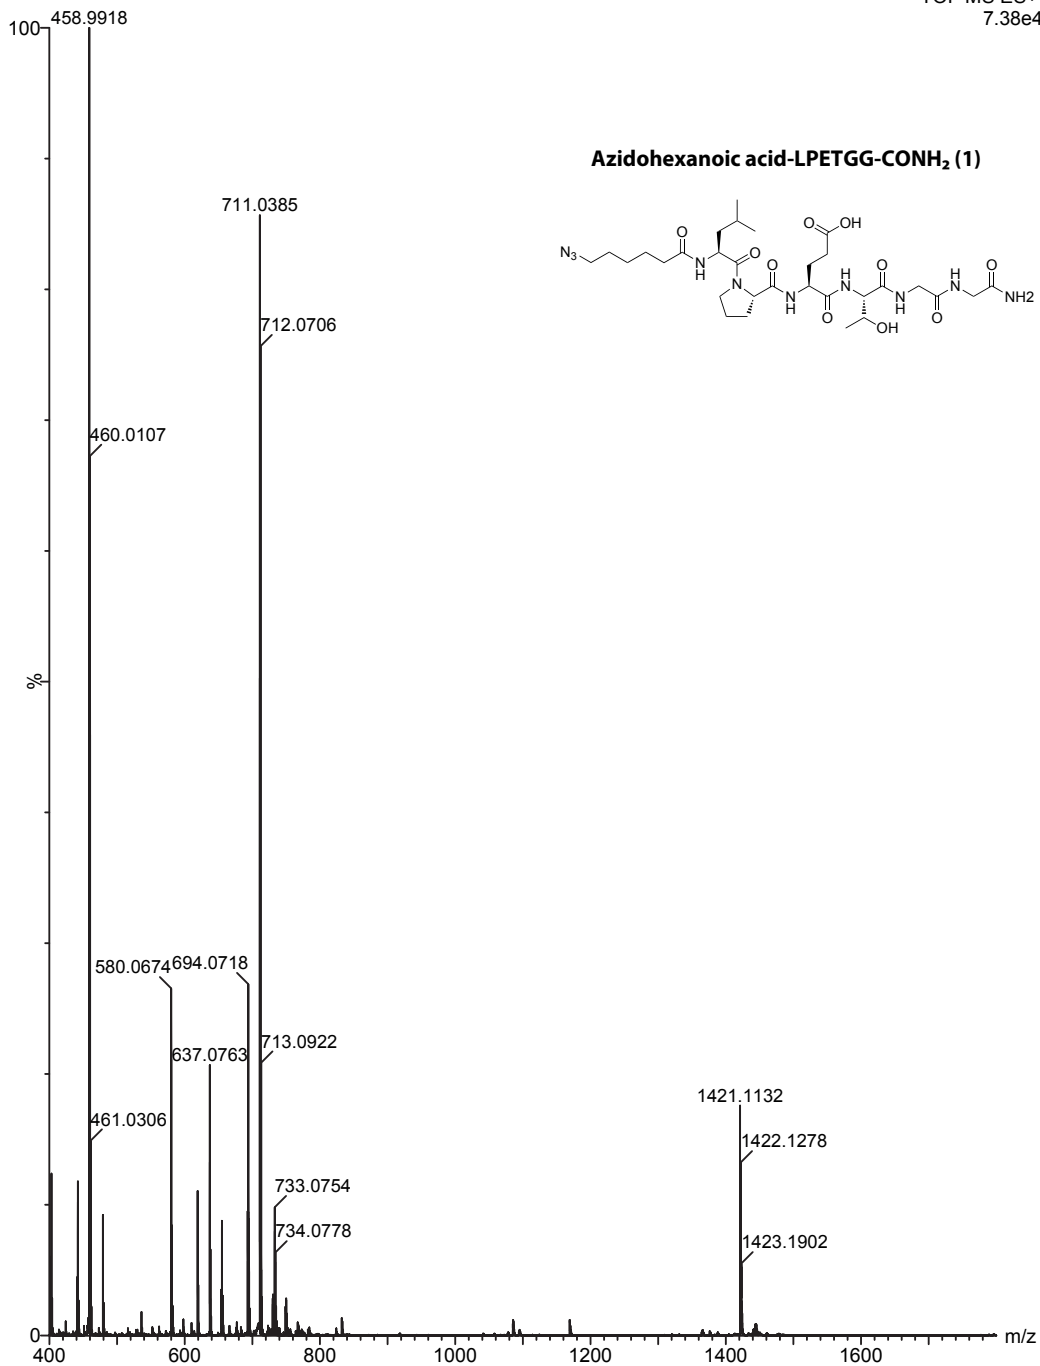







H<sub>2</sub>N-GGGK(N<sub>3</sub>)K(TAMRA)-CONH<sub>2</sub> (3)

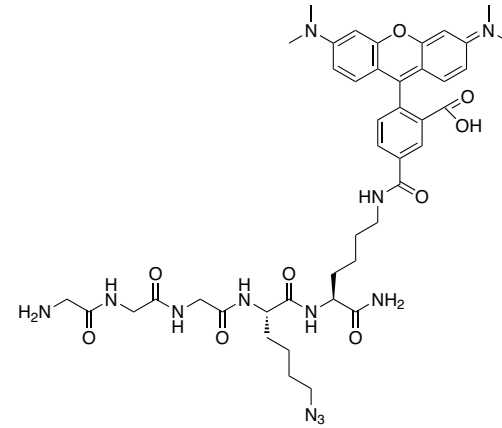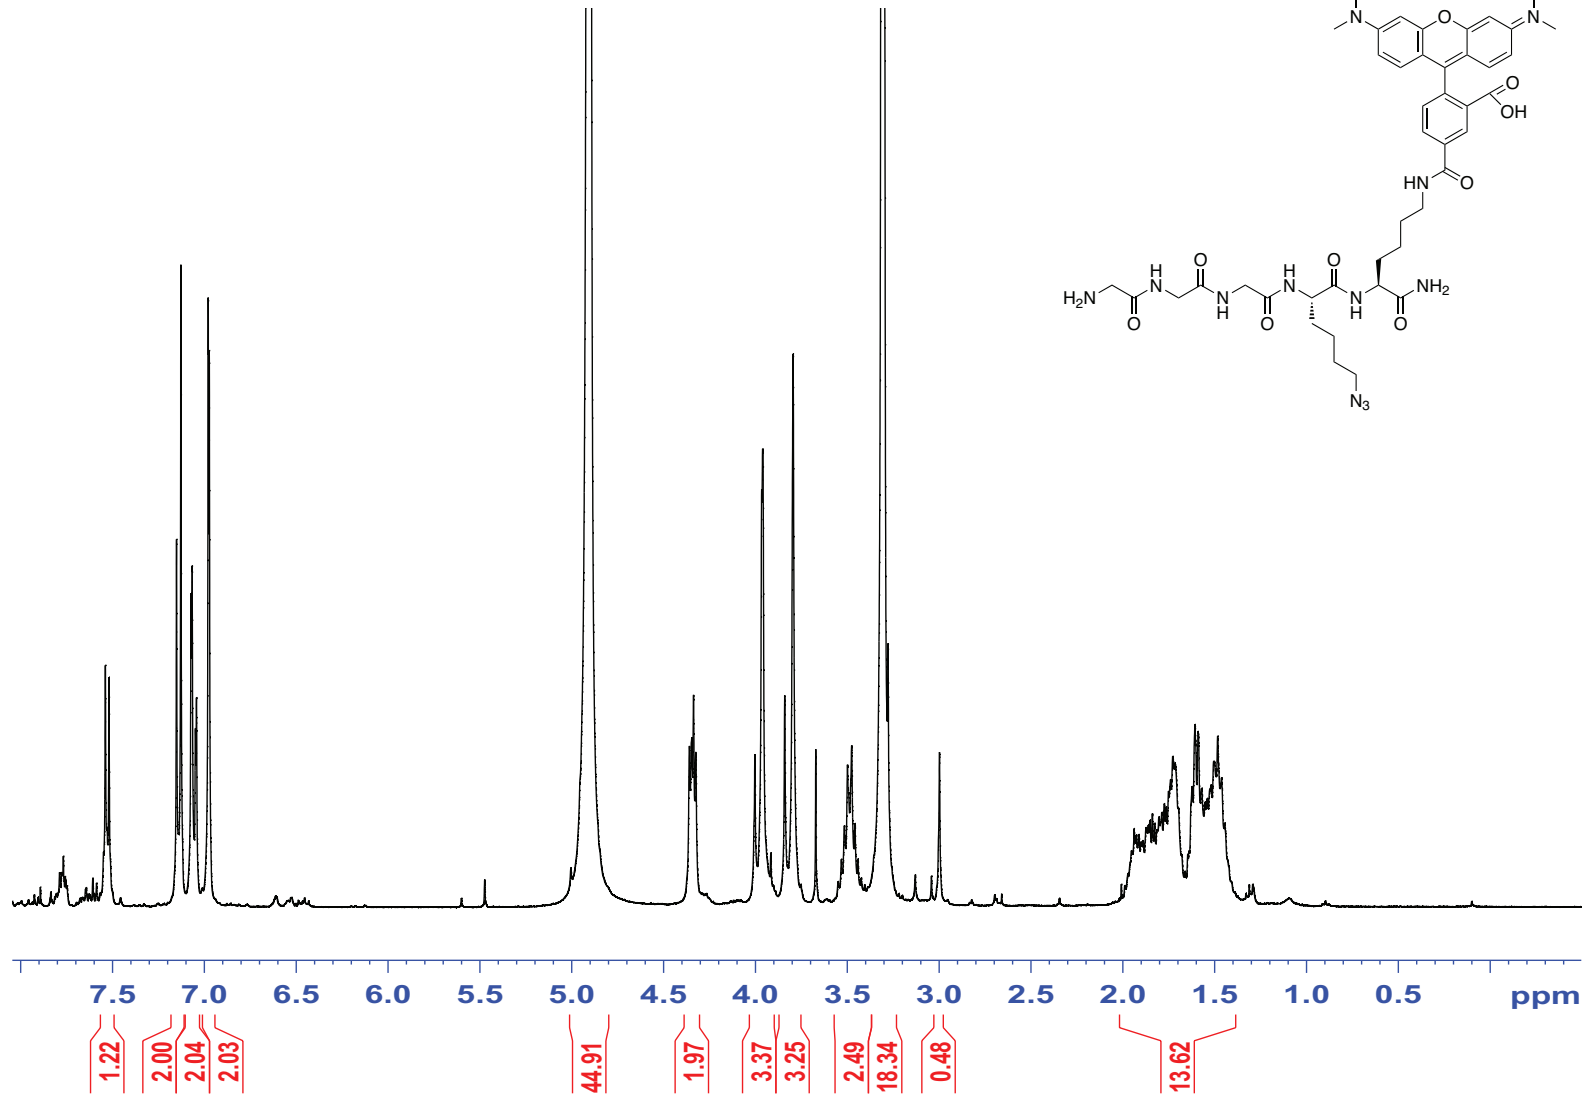





TOF MS ES+  
8.20e3

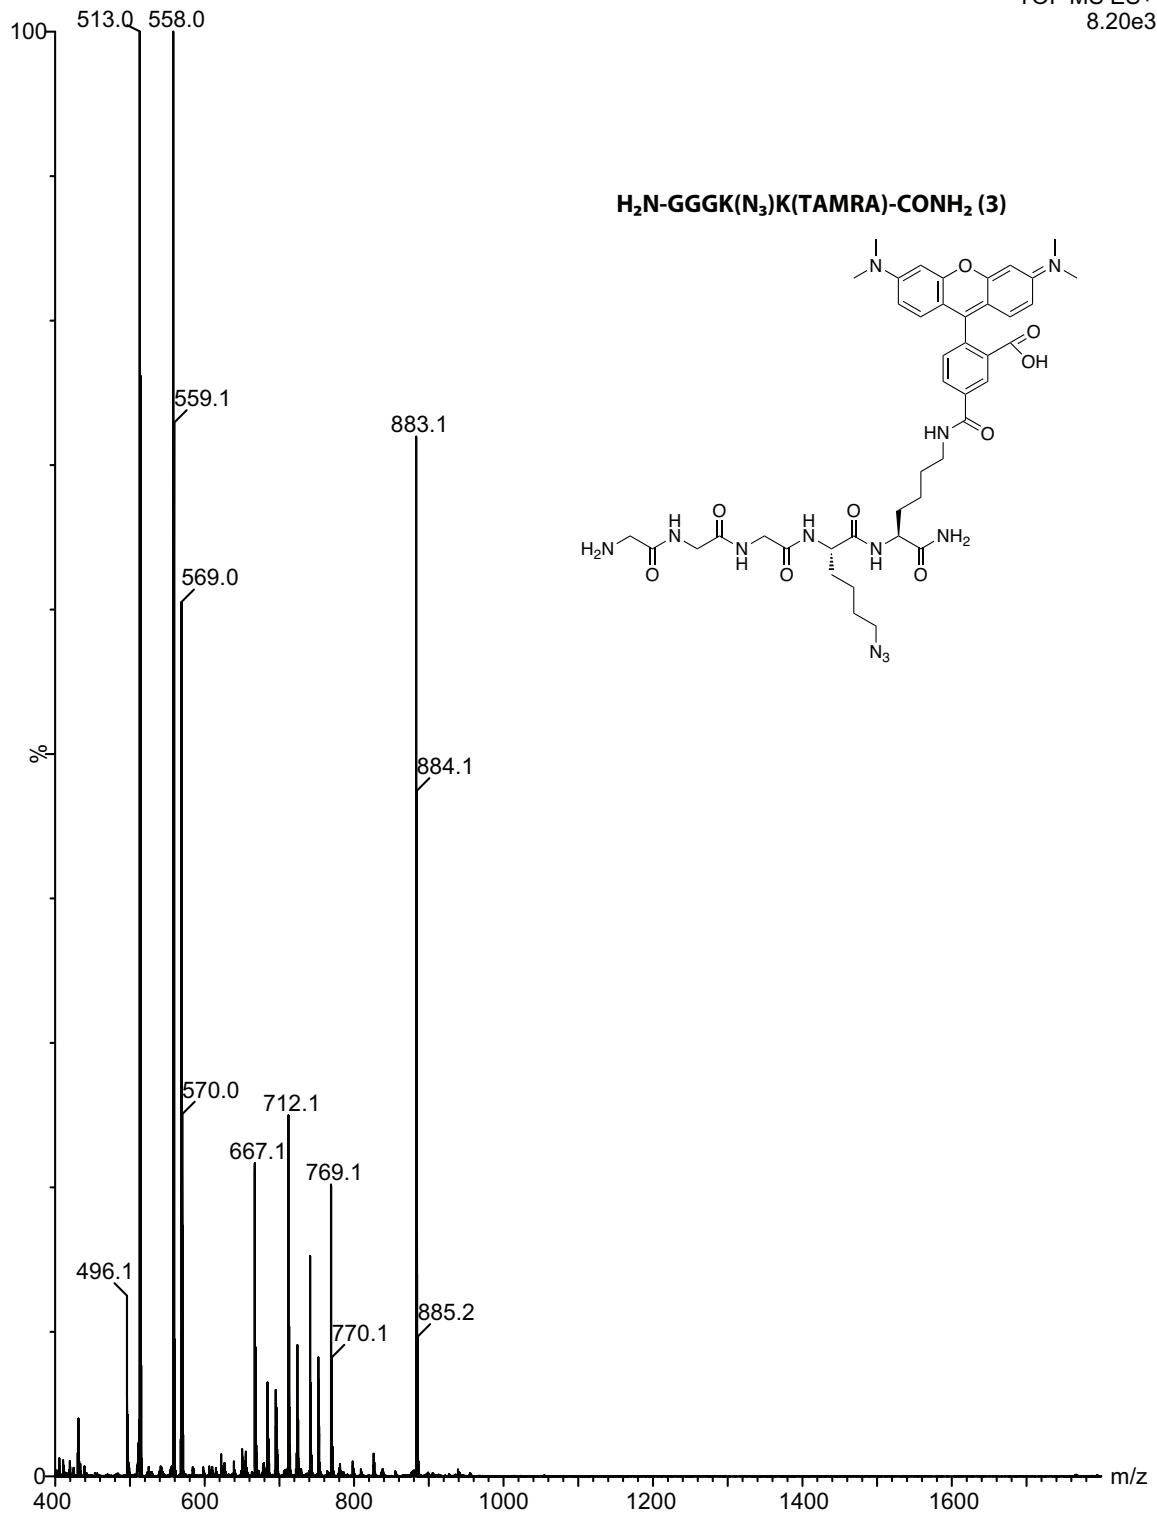

**H<sub>2</sub>N-GGK(N<sub>3</sub>)K(TAMRA)-CONH<sub>2</sub> (3)**

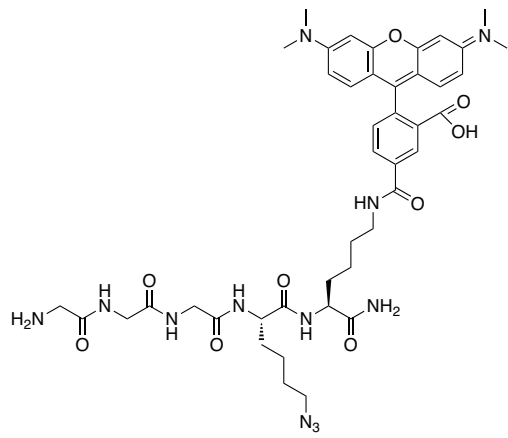

H<sub>2</sub>N-GGGC(DIBAC)-CONH<sub>2</sub> (4)

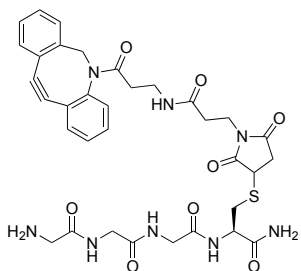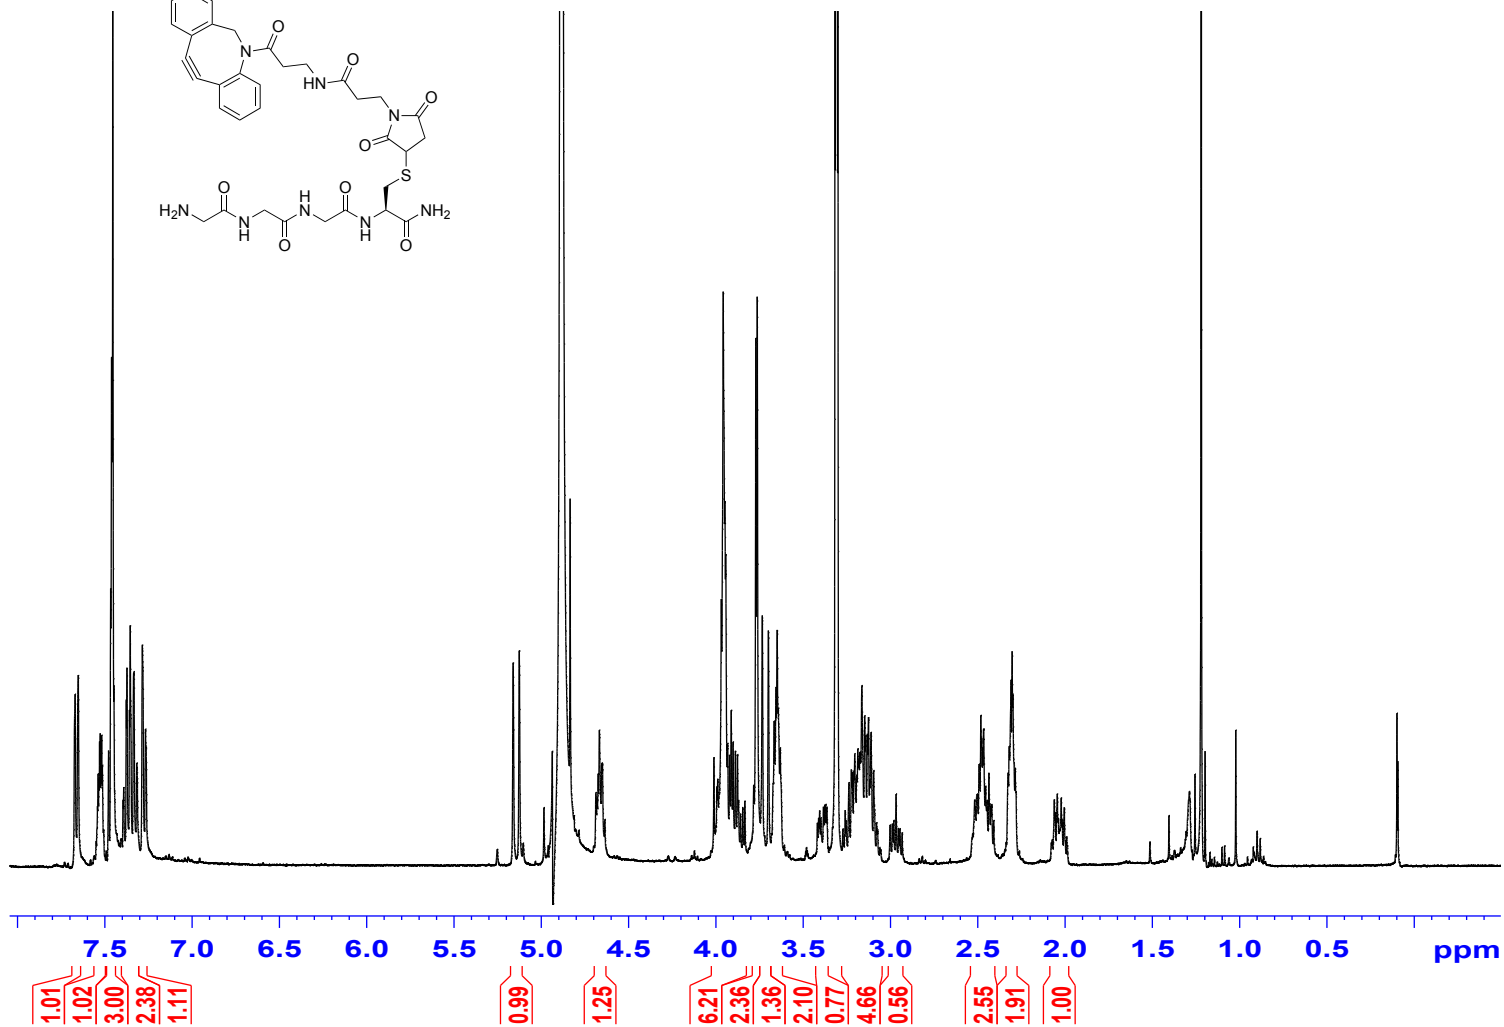





H<sub>2</sub>N-GGGK(Azidohexanoic acid)-CONH<sub>2</sub> (5)

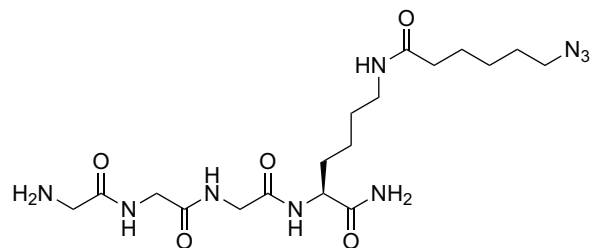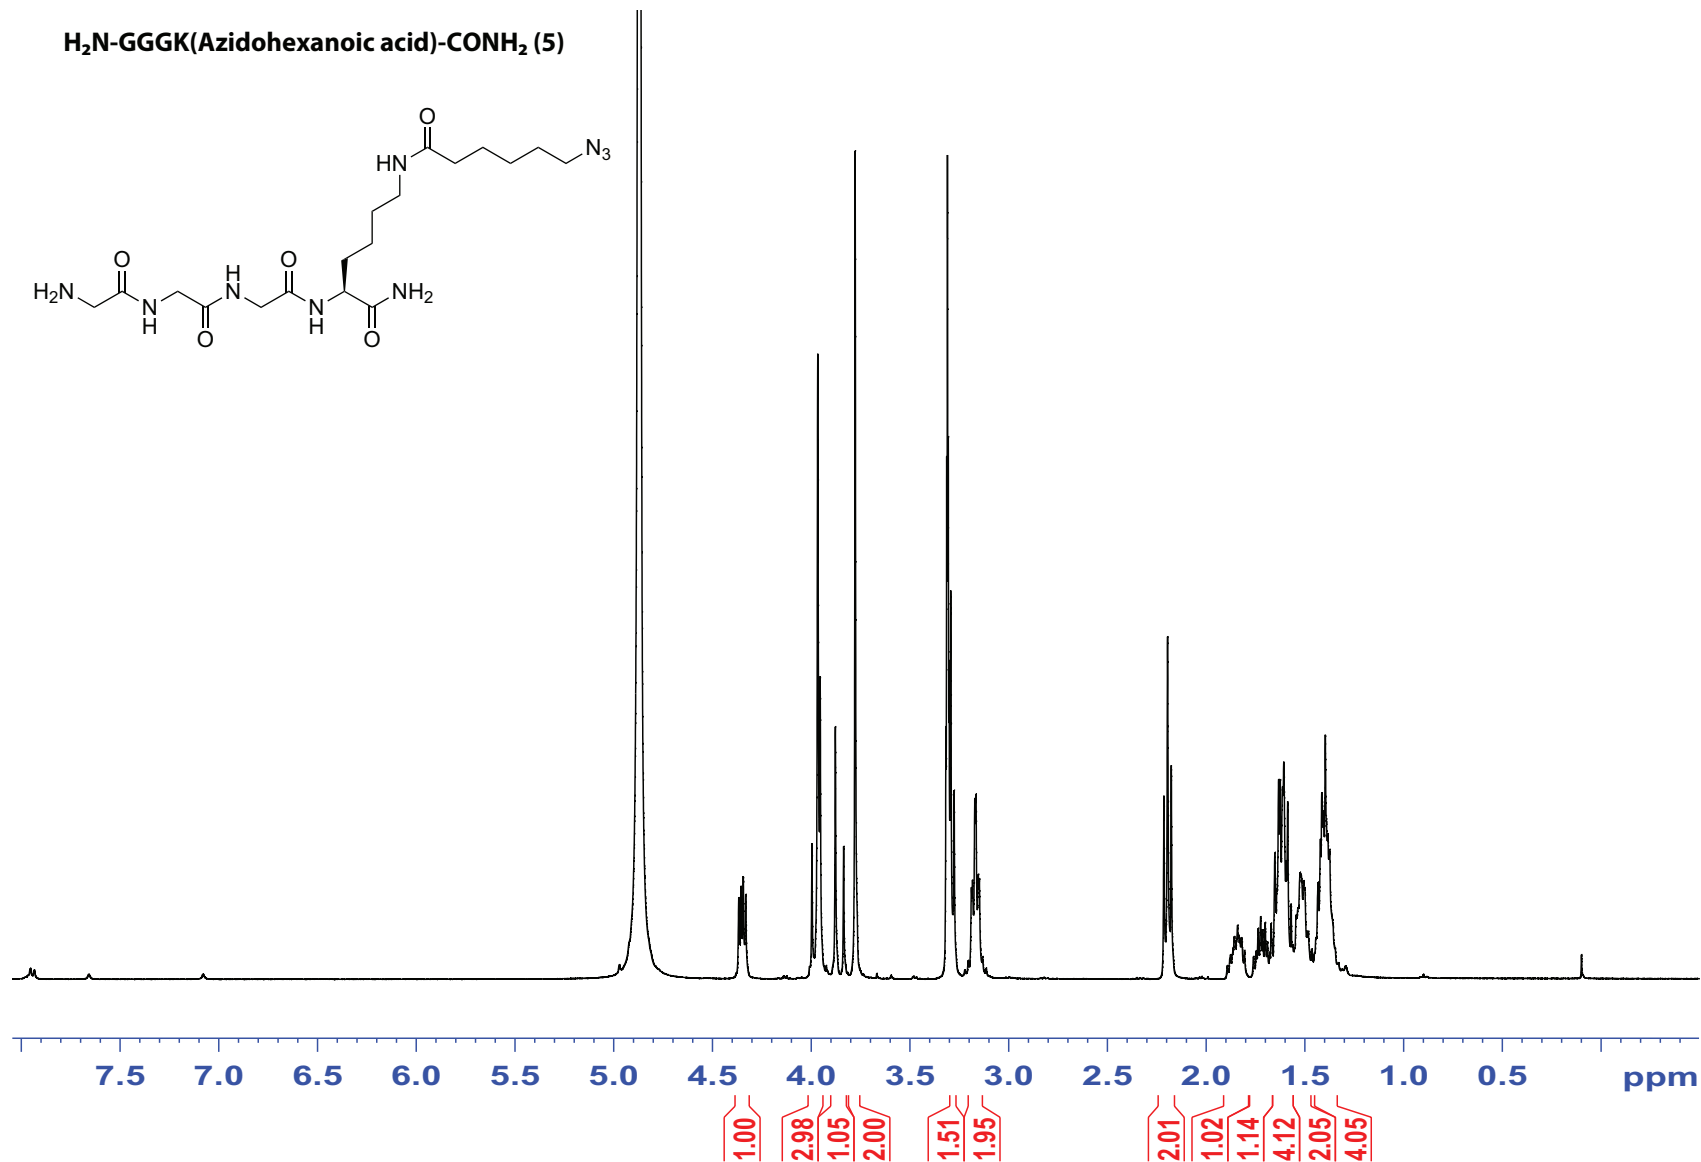

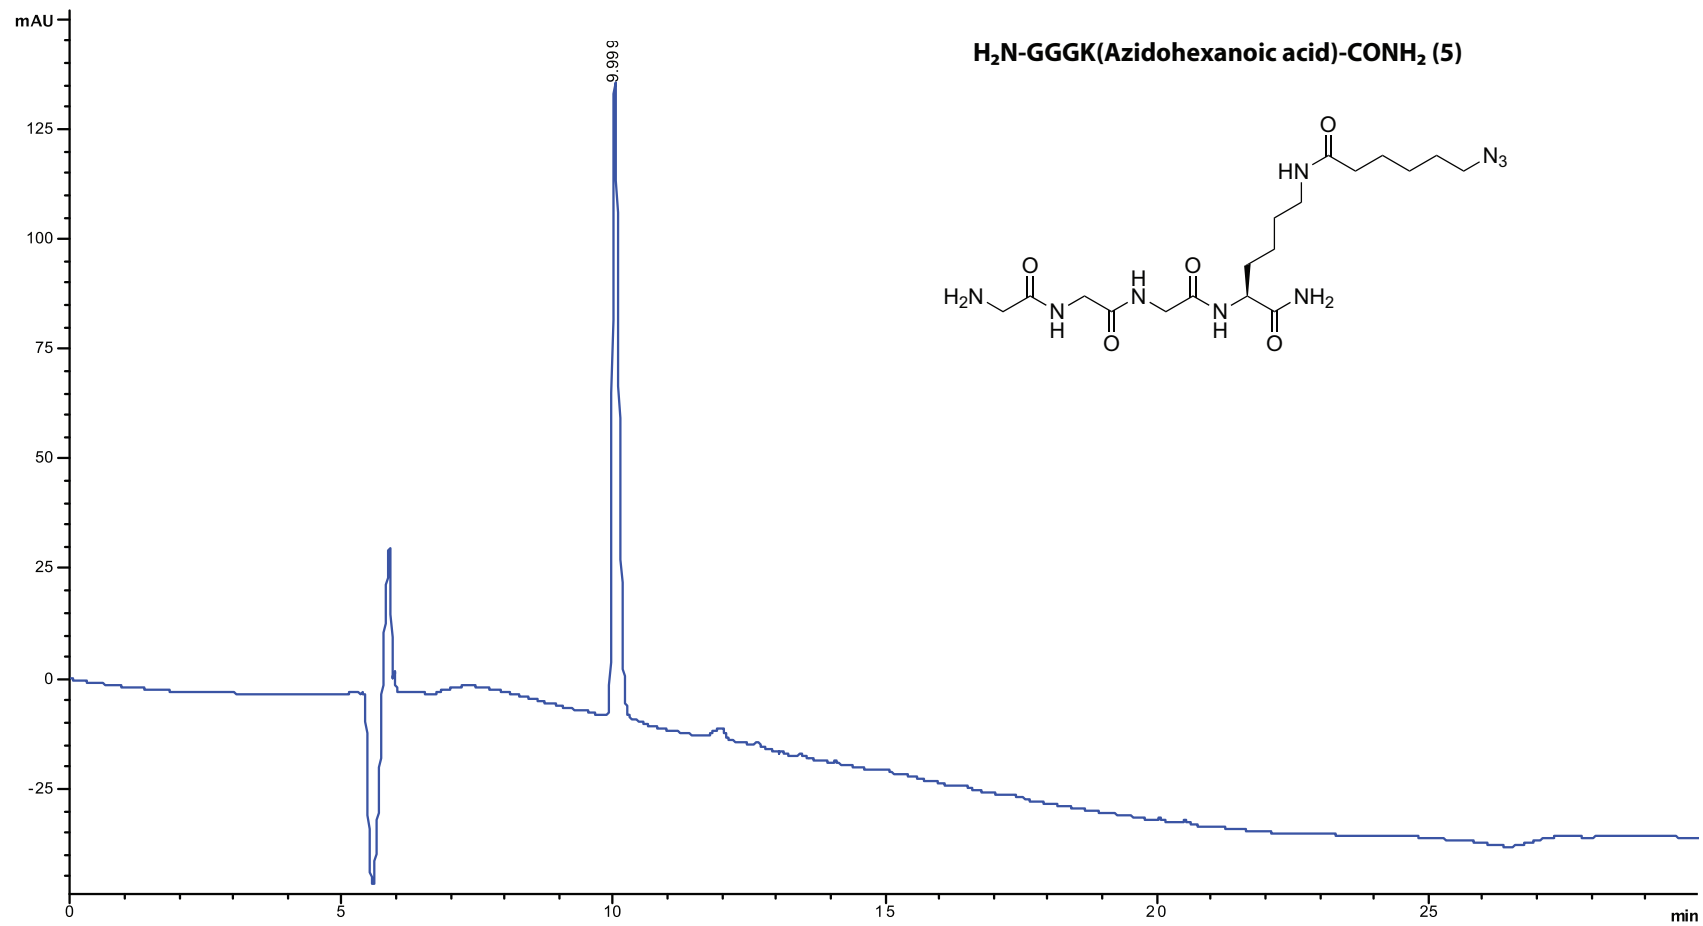

**H<sub>2</sub>N-GGGK(Azidohexanoic acid)-CONH<sub>2</sub> (5)**

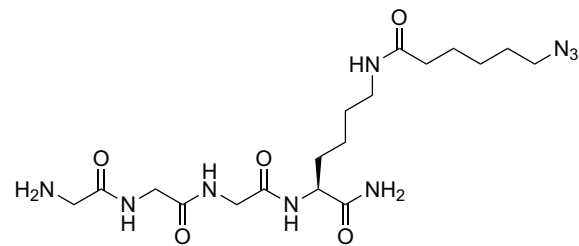

TOF MS ES+  
9.43e3

**H<sub>2</sub>N-GGGK(Azidohexanoic acid)-CONH<sub>2</sub> (5)**

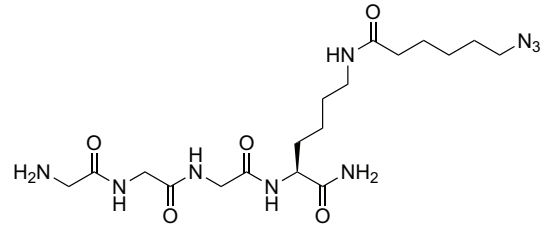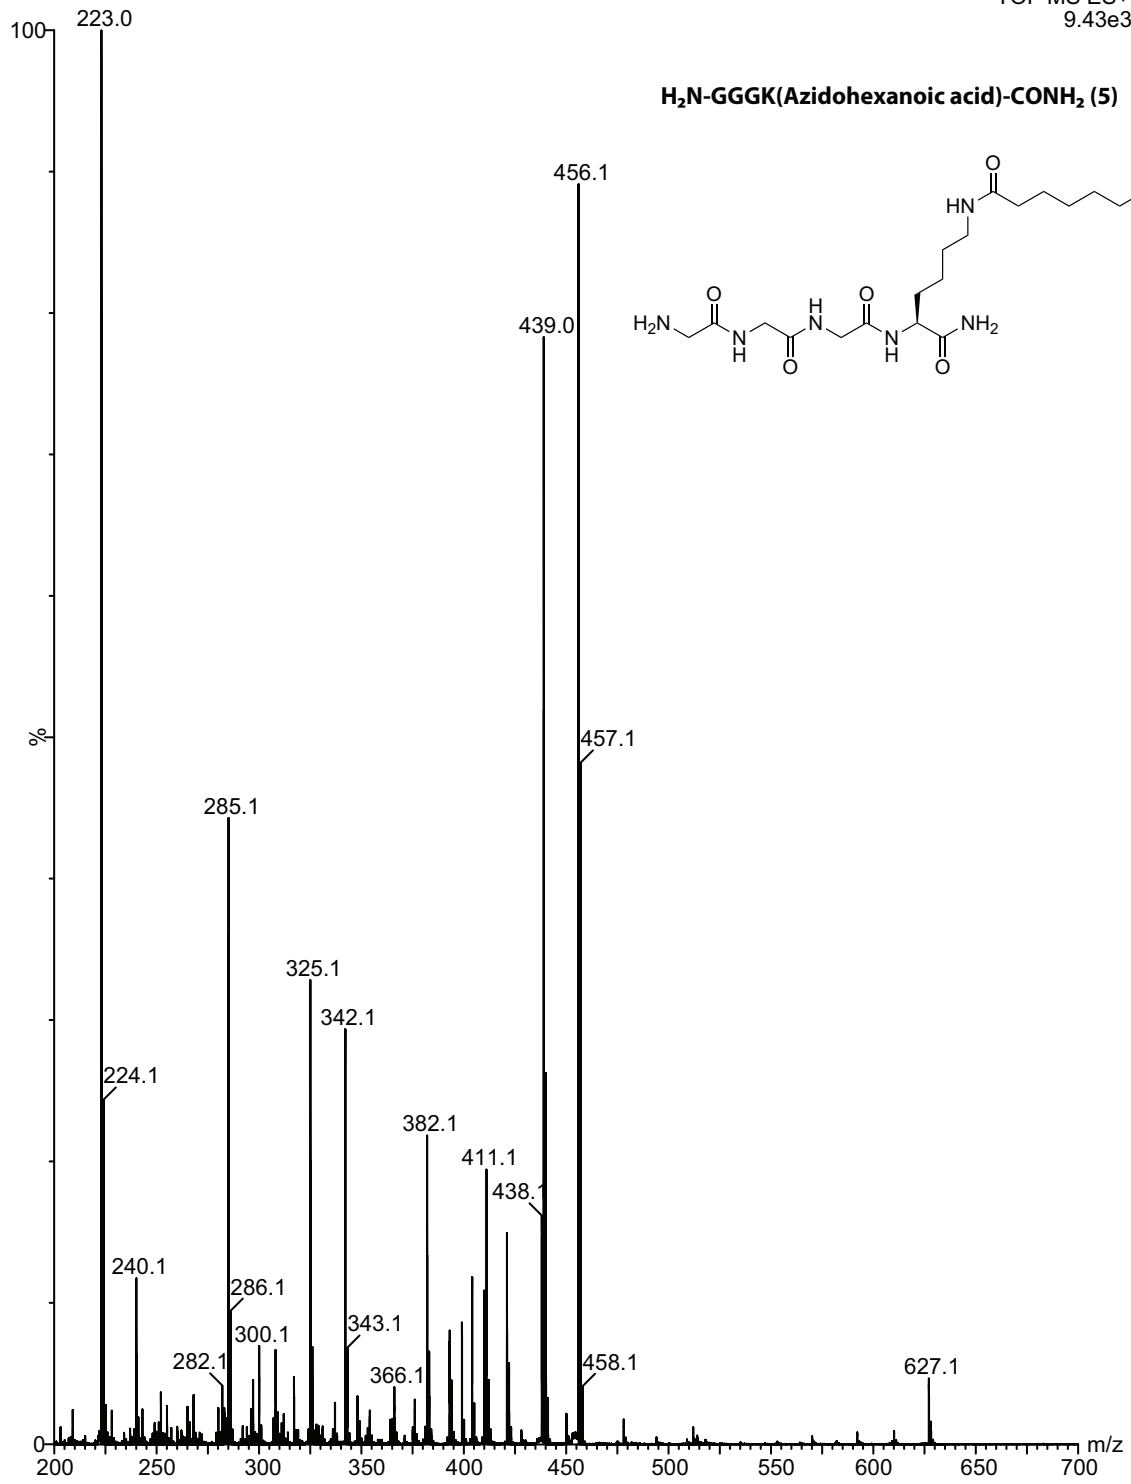

# DIBAC-LPETGG-Ub

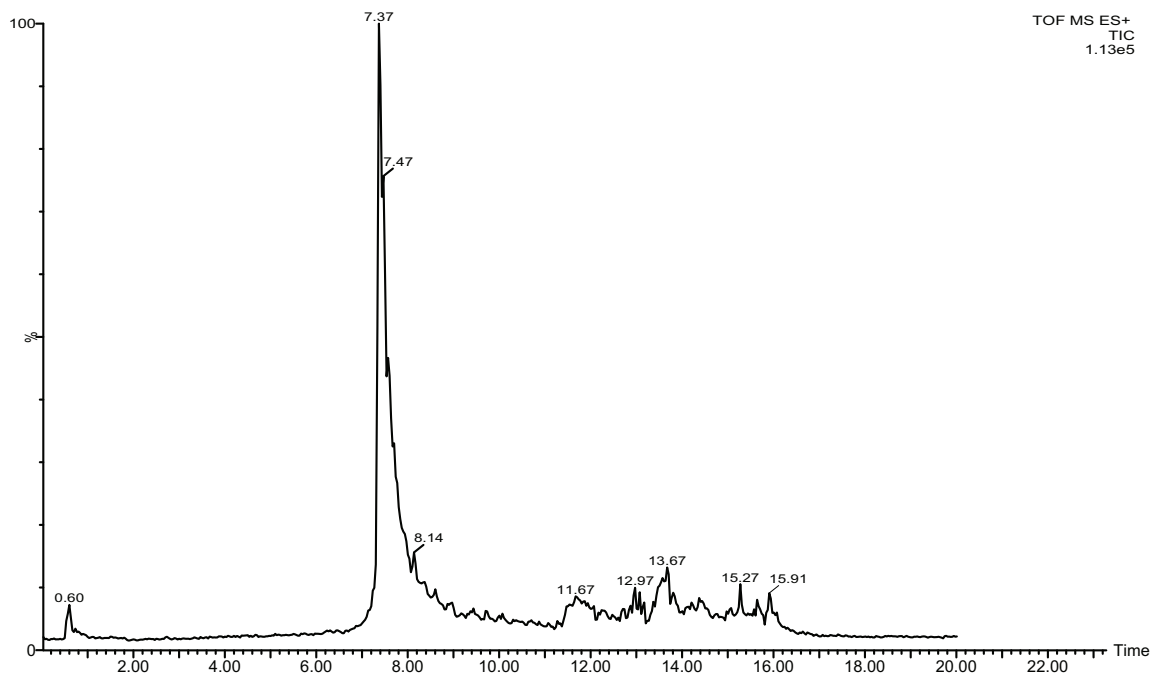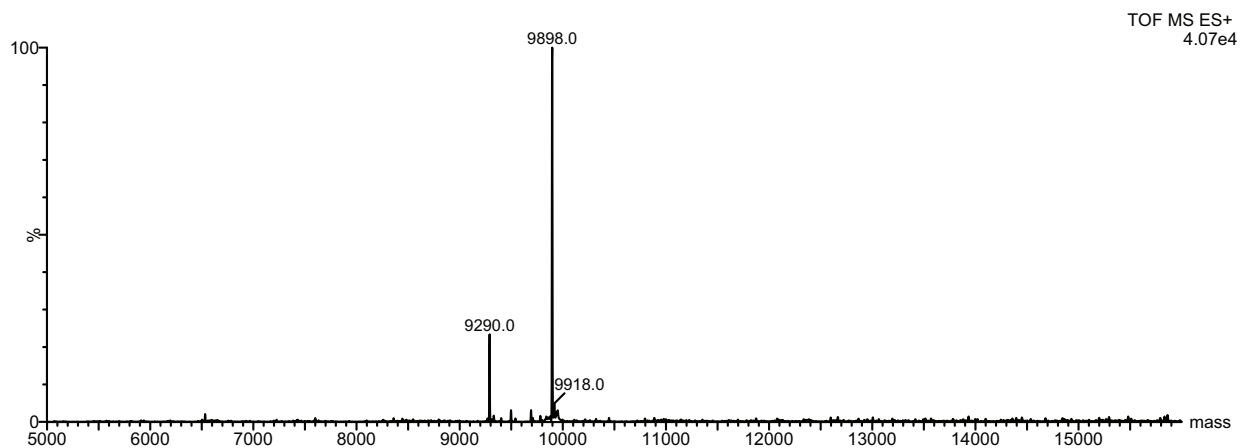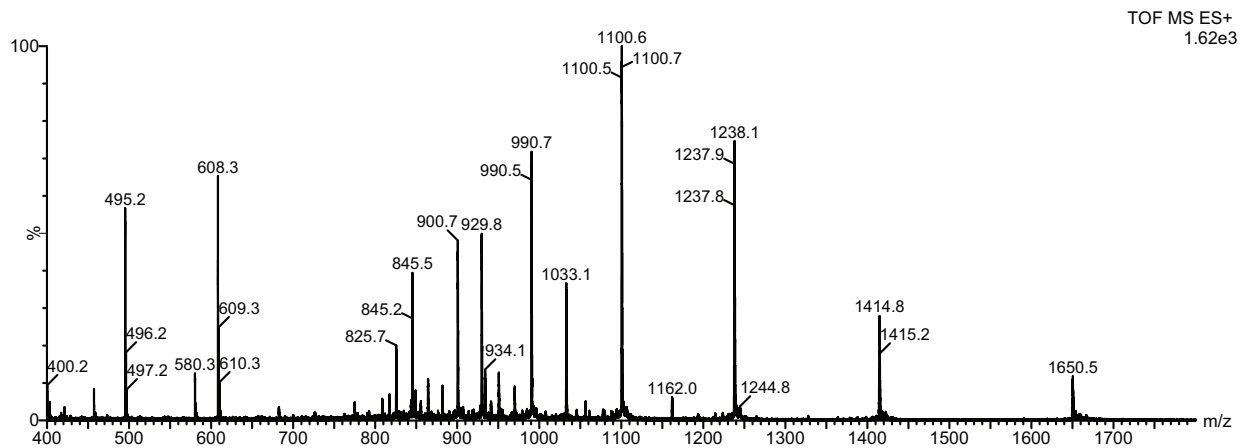



# Azidohexanoic acid-LPETGG-Ub

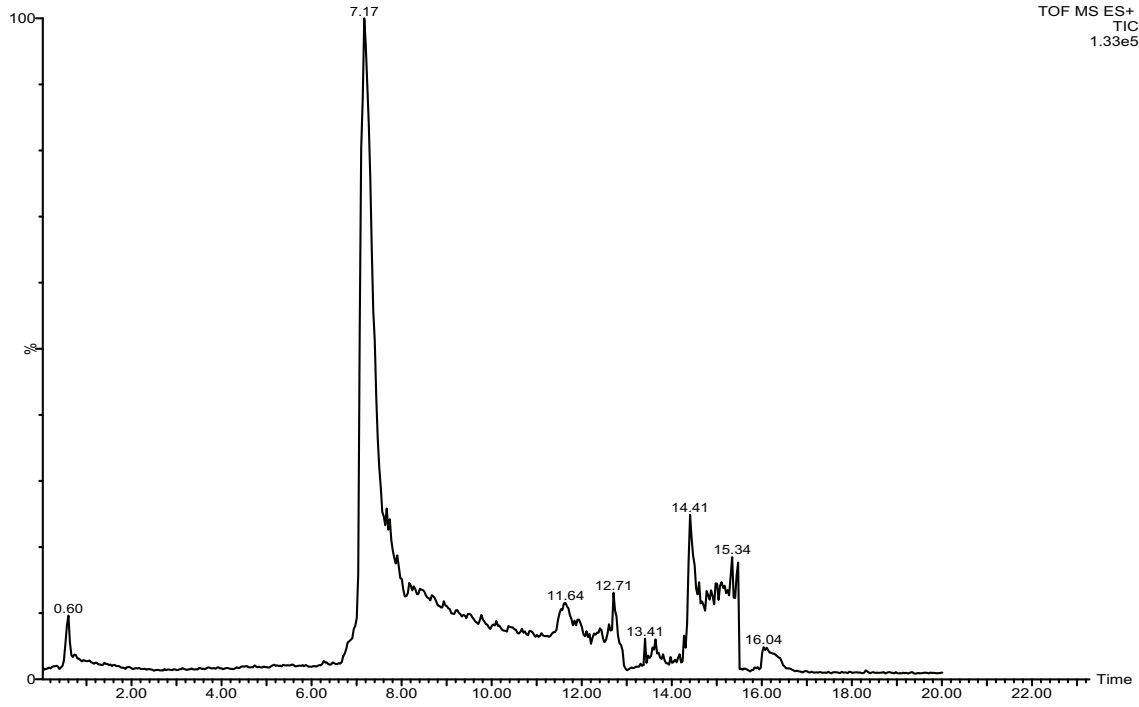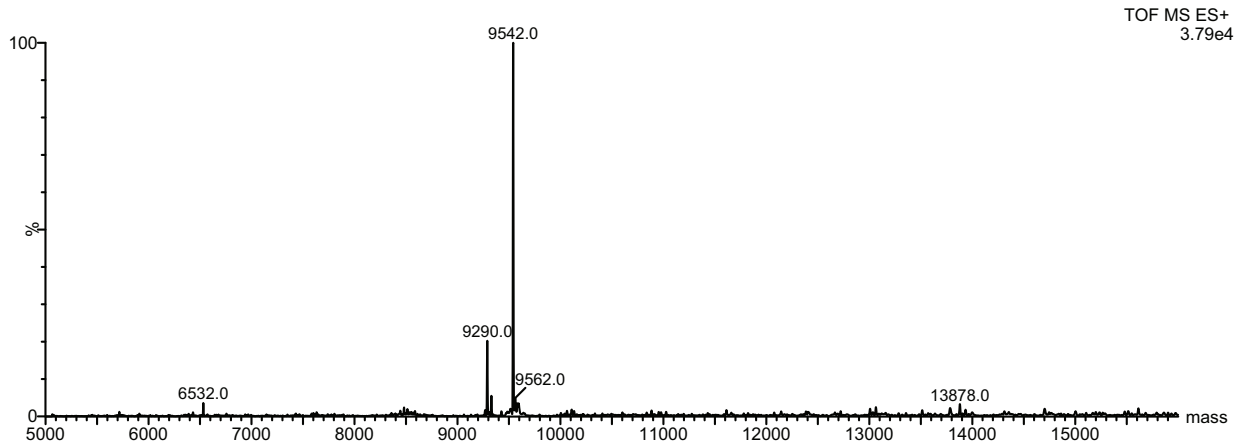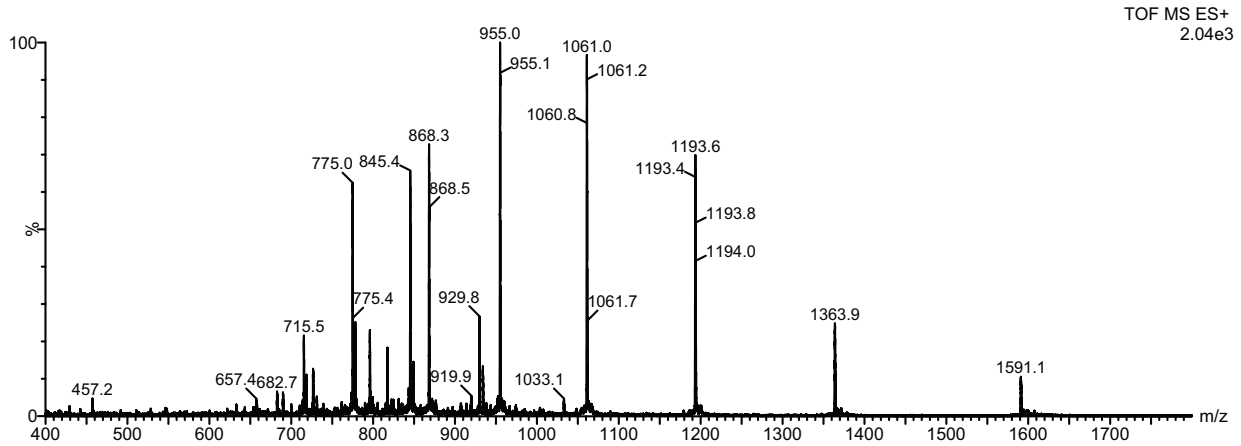



### VHH7-3

TOF MS ES+  
438

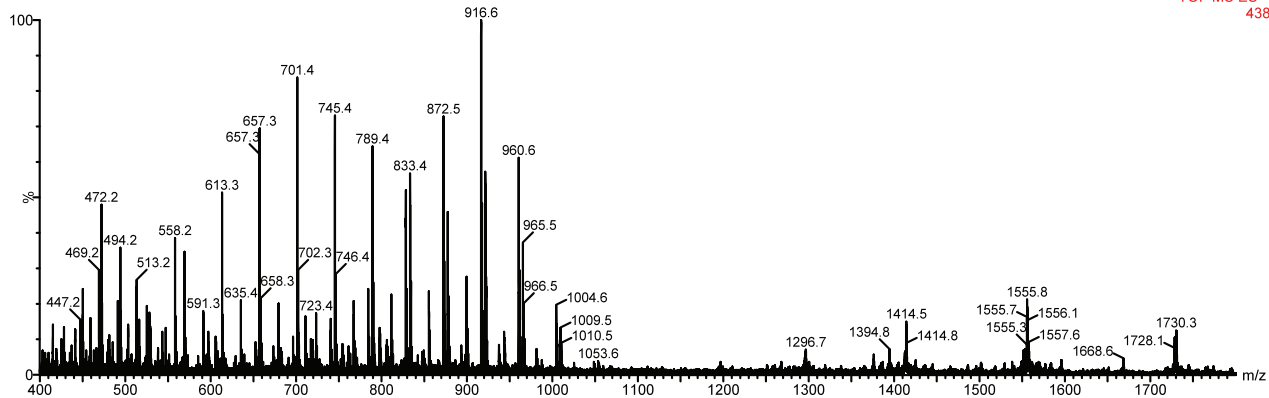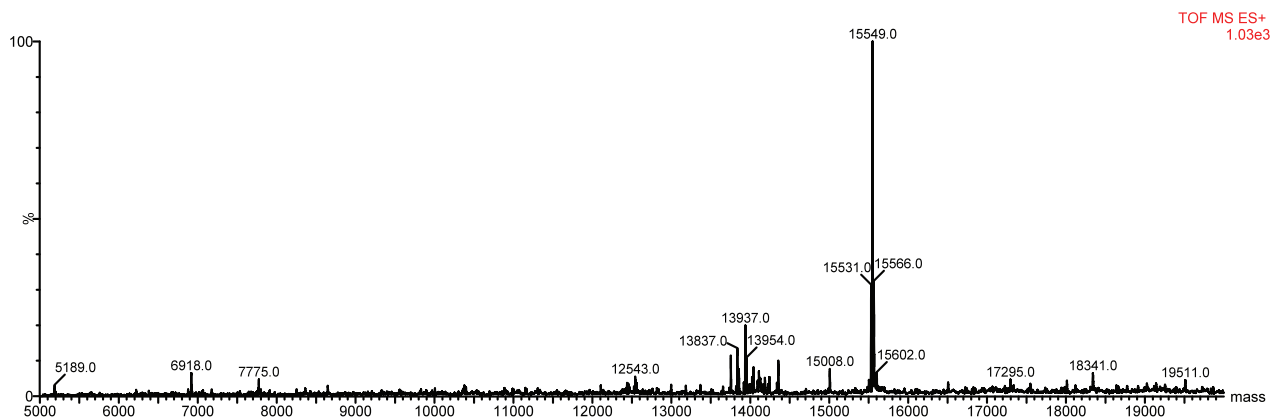

### VHH7-5

TOF MS ES+  
3.74e4

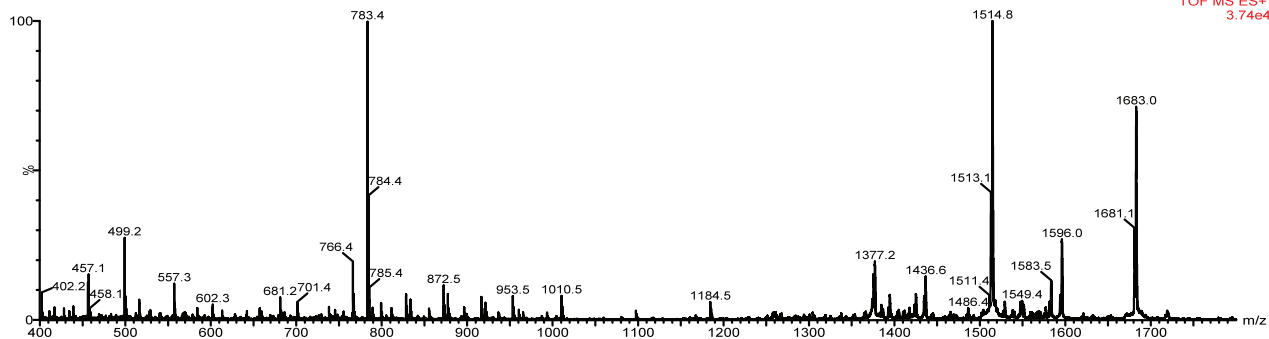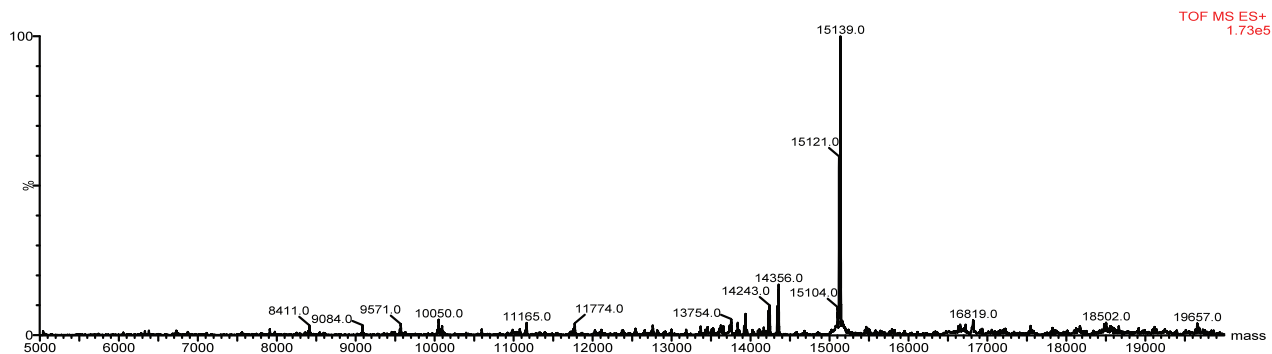

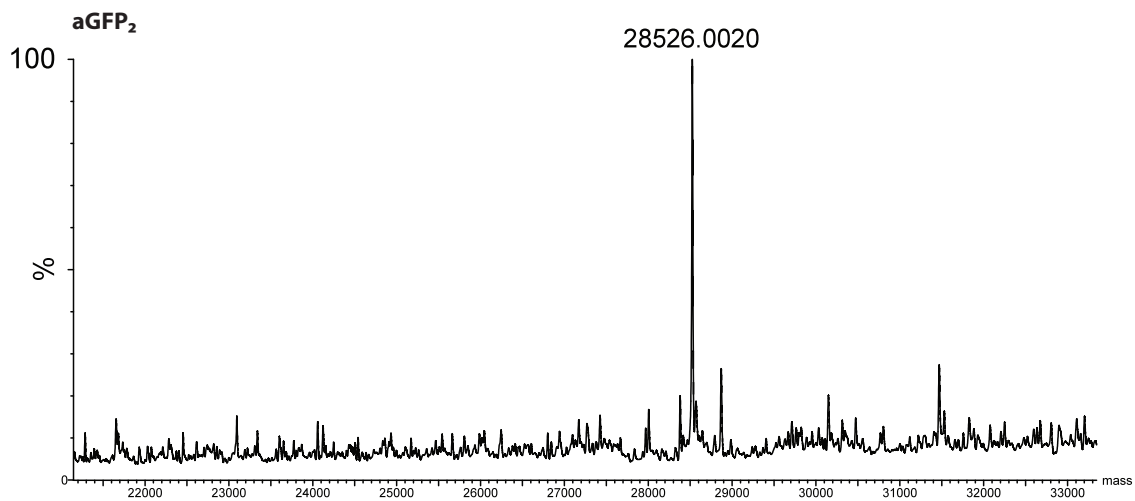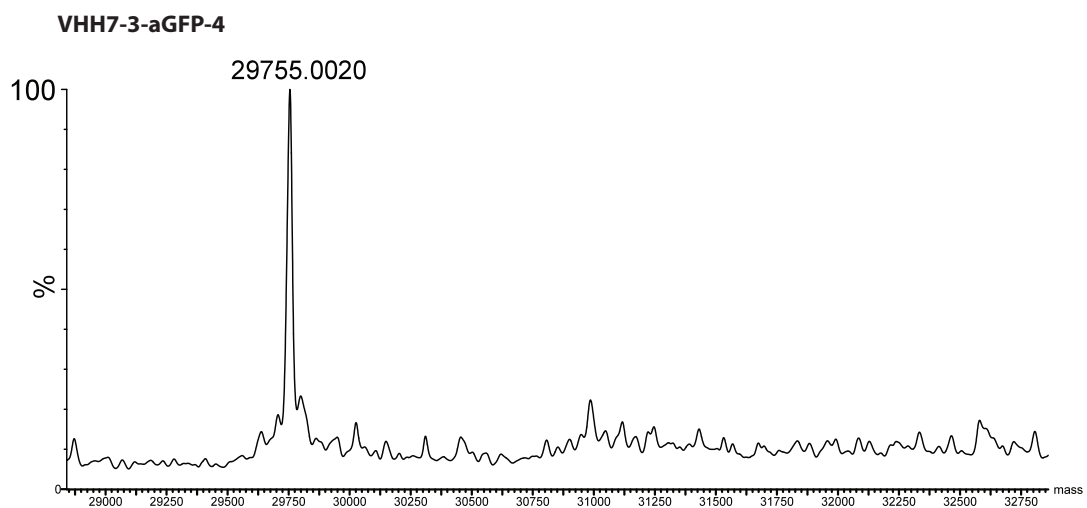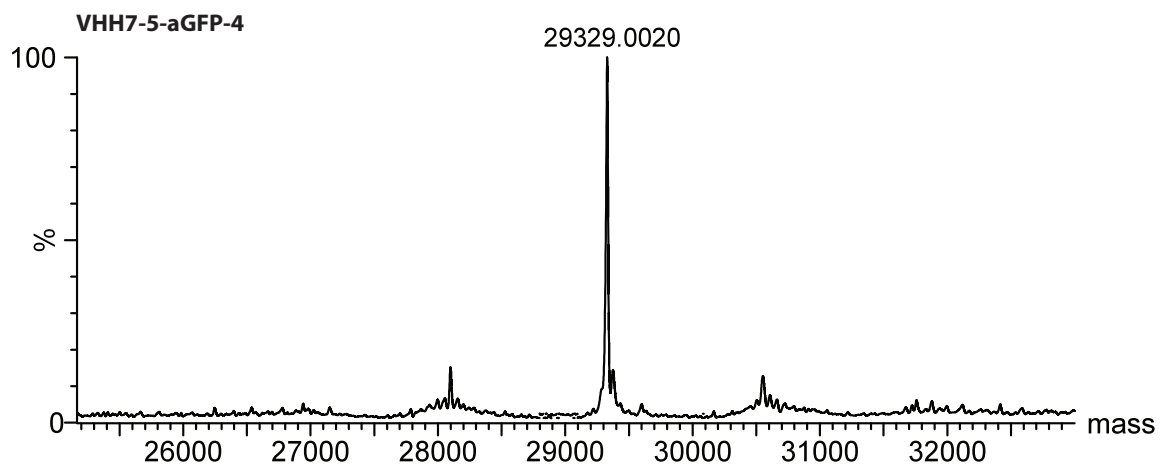

Supplement: 1205427109_sapp.pdf [file 1205427109_sapp.pdf]
